# Supplementary material for: Sample Entropy of the Heart Rate Reflects Properties of the System Organization of Behaviour
Source: Entropy (Basel). 2018 Jun 8;20(6):449. doi: 10.3390/e20060449 (PMC7512967; doi:10.3390/e20060449)
Supplement: Supplementary file 1 [file entropy-20-00449-s001.xlsx]

## Sheet: experiment1
group	number of mistakes German	response time_German	number of mistakes Russian	response time_Russian	SampEn German	SDNN German	av-RR German	SampEn Russian	SDNN Russian	av-RR Russian
1-5 years	12	8428	results were not saved due to technical circumstances		1.17381	47.2709	757.752	1.14069	44.0196	765.408
1-5 years	9	9379.5	0	5191	1.30555	40.1235	733.308	1.16848	42.2453	775.729
1-5 years	4	8754	0	4495	1.1063	60.875	705.882	1.06511	74.1443	685.799
1-5 years	5	6212.5	0	5333	1.34648	38.9911	647.293	1.11999	33.5854	636.586
6-18 years	2	8150	0	5335	1.32284	37.298	636.383	1.19539	54.356	695.042
6-18 years	16	8644	0	5601	1.39811	37.1961	737.283	1.21078	41.7182	742.282
1-5 years	8	12124	0	4100	1.13995	43.0325	767.054	1.15391	49.9694	840.855
6-18 years	3	4851	0	3300	1.16712	48.2055	873.049	1.05003	61.0742	926.962
6-18 years	10	6803	0	3831	1.07331	39.6182	545.549	1.08397	37.5016	579.462
1-5 years	6	10409	0	6352	1.40299	34.4567	690.738	1.19538	24.7219	658.773
1-5 years	12	6362	0	4245	1.43052	47.989	704.289	1.05627	61.8383	734.911
1-5 years	13	5193	1	3673.5	1.29718	52.0951	641.093	1.07689	53.6493	608.776
1-5 years	15	10952.5	0	3787	1.05877	31.8306	605.353	1.11416	28.6466	584.896
1-5 years	15	15079.5	0	7249	1.05835	52.3873	618.422	0.955135	53.9793	608.736
1-5 years	12	11454	0	6016	1.30195	51.6573	672.773	1.08977	74.2544	761.769
1-5 years	4	6615	0	3377	1.08682	76.52	727.613	0.977866	71.1266	715.004
1-5 years	4	7904	0	4831	1.3632	49.8314	759.253	1.2079	47.6498	753.656
6-18 years	7	7208.5	0	3207	1.51748	57.6888	748.699	1.18868	64.7905	755.681
6-18 years	6	1190	1	2578.5	1.16665	24.3902	675.673	1.05486	33.9073	666.17
1-5 years	13	7815	0	3209	1.14058	73.6731	697.385	1.13174	84.002	744.028
1-5 years	15	6979.5	3	3783	1.45736	29.2836	611.181	1.2105	31.6883	641.176
1-5 years	13	5352.5	0	3902	1.39945	57.5045	788.06	1.28169	45.9593	790.123
6-18 years	4	3899	0	2445	1.12277	59.6564	725.307	0.923325	57.9233	744.09
1-5 years	13	6895	0	4271	1.25567	48.9467	796.224	1.12742	45.5617	741.633
1-5 years	6	11943	0	5115	1.3246	62.8377	792.344	1.07831	62.5524	800.91
6-18 years	10	11824	0	3835	0.755146	23.0539	584.306	1.07208	15.1038	549.653
6-18 years	5	8411.5	0	3724	1.38384	48.0521	782.161	0.947311	54.9369	791.904
6-18 years	2	766	0	873	1.12079	51.0097	712.941	1.08782	33.3544	675.203
6-18 years	2	3565	1	2885	0.563979	52.9661	547.421	0.72493	47.972	571.061

## Sheet: experiment2
participant's №	SampEn_mathematical	SDNN_mathematical	Av_RR_mathematical	SampEn_common	SDNN_common	Av_RR_common	number of mistakes_mathematical	response time_mathematical	number of mistakes_common	response time_common
AK01	0.940858	36.5316	828.404	0.875207	31.5814	839.602	14	6098.72	3	4448.59
AK02	1.02061	76.6803	1006.9	1.01637	76.2484	987.943	2	6304.73	2	3687.2
AK03	1.00105	87.7736	1023.48	0.805012	95.0849	1004.13	6	3109.08	2	2722.83
AK04	1.1136	42.5644	787.81	1.07495	43.2135	784.459	3	6502.34	3	6060.34
AK05	1.11188	61.9221	911.197	1.04358	53.0678	949.998	7	4552.96	3	5344.86
AK06	0.960477	45.4134	739.019	0.911829	41.9207	726.545	4	6363.11	2	5034.57
AK07	0.874279	142.638	1006.09	0.830253	97.0545	1028.41	4	1965.57	2	1931.4
AK08	1.15294	52.1307	732.398	0.791364	43.6679	756.207	6	2393.42	2	2284.37
AK09	0.915535	51.7935	752.44	0.864866	44.517	757.918	3	4884.69	2	2933.63
AK10	0.844926	76.9661	802.519	0.75385	70.3116	813.735	6	3698.08	2	2233.03
AK11	1.0449	38.3008	729.693	0.875399	56.2224	713.518	8	2801.83	2	2426.8
AK12	1.1622	56.3547	832.095	0.997183	56.5086	810.022	8	4896.58	2	4852.47
AK13	1.31749	80.8677	860.147	0.872855	105.328	829.819	3	20733.9	2	12718
AK14	1.12279	50.1402	747.048	0.968341	55.9544	750.244	4	17440.2	2	6149.97
KA01	1.27358	55.5947	746.125	1.04515	61.4136	775.301	results were not saved due to technical circumstances
KA02	1.18128	110.144	953.709	0.990527	99.6964	978.36	13	6773.26	4	4074.82
KA03	0.823378	30.9031	566.16	0.741719	29.9562	553.023	6	3795.23	2	4311.8
KA04	1.11944	43.6184	704.686	1.01222	55.1279	718.723	6	6705.15	3	11224.9
KA05	1.32519	65.1795	726.009	1.05813	50.5702	700.585	4	19230.9	2	6395.47
KA06	1.00473	125.598	946.073	0.980113	112.319	968.3	3	3773.14	3	3844.59
KA07	1.05387	75.8645	907.129	1.02835	90.3293	922.32	5	6008.59	4	4821.39
KA08	0.980012	44.6659	799.096	1.00657	48.976	813.594	9	3169.52	3	3289.14
KA09	1.2892	58.0479	791.075	1.16104	51.0151	789.647	3	7698.66	3	6947.86
KA10	1.12875	70.937	931.017	1.10973	86.8187	921.809	20	6193.17	2	6381.33
KA11	1.03896	70.5106	722.156	0.886067	58.2447	753.456	8	3806.17	4	3101.54
KA12	0.881974	84.4098	1045.57	0.70053	78.3194	1009.55	5	3672.52	5	2683.81
KA13	1.04867	54.0491	820.561	0.982552	64.715	826.784	8	3254.79	2	3978.47
KA14	0.933032	27.7813	690.658	0.766611	40.0535	734.117	6	4424.23	5	3654.7
KA15	1.24291	30.1297	709.458	1.14616	32.7422	729.132	7	3857.32	4	3525.23
KA16	1.086	59.6055	862.495	1.04317	73.699	888.921	7	2579.44	3	2393.69
KA17	1.14451	66.577	784.34	0.971898	56.6551	785.978	9	7020.52	2	5615.47
KA18	1.15291	46.0392	818.405	0.962557	43.2983	814.418	6	3916.35	2	3020.57
KA19	1.14143	57.3004	915.801	0.961709	60.416	915.58	21	2480.64	2	2779.8
KA20	1.06859	95.6238	964.223	0.852029	91.3116	1002.18	16	10598.1	4	5366.96
KA21	1.31555	52.8062	790.79	1.16265	61.0759	826.387	5	2635.33	2	2635.53

## Sheet: experiment3
alkohol condition								control condition
File name	SampEn_5	SampEn_10	SampEn_15	SampEn_20	SampEn_25	SampEn_30			File name	SampEn_5	SampEn_10	SampEn_15	SampEn_20	SampEn_25	SampEn_30
ak01_a_5	1.03913	1.06781	1.11229	1.19571	0.711517	0.849232			ak1_k_5	1.14663	1.08732	1.09017	1.08791	1.13393	1.14048
ak02_a_5	1.25385	1.0718	1.00754	1.06297	1.12369	1.1685			ak2_k_5	1.11121	1.11711	1.19386	1.11752	1.20133	1.09803
ak03_a_5	1.07044	0.958981	1.08084	1.04899	0.850179	0.815007			ak3_k_5	1.1707	1.1269	1.0873	0.92073	1.15198	1.19357
ak04_a_5	1.34329	0.891068	0.977966	0.94517	0.998561	0.8954			ak4_k_5	0.924929	0.97738	1.12463	1.10111	1.18346	1.17731
ak05_a_5	0.971302	1.1086	1.13084	1.05748	1.19599	0.99075			ak5_k_5	1.05169	1.09262	1.13658	0.981382	1.13947	0.951553
ak06_a_5	1.03603	0.916417	0.928077	0.988936	0.991791	0.864946			ak6_k_5	0.895202	0.975368	0.883543	0.901565	1.01237	1.00054
ak07_a_5	0.773506	0.960082	0.999802	0.729023	0.875573	0.655977			ak7_k_5	1.14849	1.01959	0.801376	0.763432	1.00791	0.73367
ak09_a_5	0.497245	0.718133	0.720594	0.700592	0.677513	0.651385			ak9_k_5	0.838395	0.874306	0.920313	0.862293	0.9691	0.853476
ak10_a_5	1.06309	1.15088	0.942794	0.82931	0.851388	0.75487			ak10_k_5	0.863354	0.872552	0.814191	1.03623	1.20434	1.14637
ak11_a_5	0.816286	0.866761	0.787567	0.894665	0.816218	0.840265			ak11_k_5	0.830693	0.822046	0.927354	1.04336	0.837173	0.997748
ak12_a_5	1.30601	1.15925	1.17328	0.900445	1.14696	1.07915			ak12_k_5	1.11363	1.08047	1.01458	1.02596	0.926664	1.0391
ka01_a_5	1.03053	0.949007	0.912113	0.861169	0.732599	0.681496			ka01_k_5	0.797842	0.888556	1.00059	0.99497	1.11345	1.08752
ka02_a_5	0.787703	0.988952	1.01542	1.01028	1.20887	1.11864			ka02_k_5	1.07737	1.23294	1.14402	1.11789	1.02889	0.981575
ka03_a_5	0.542651	0.529118	0.513184	0.785593	0.809599	0.748764			ka03_k_5	1.01872	0.995039	0.975942	1.01481	0.964383	0.867593
ka05_a_5	1.04506	1.04856	0.870046	0.858793	0.909377	0.834444			ka05_k_5	1.07939	0.894388	1.22057	0.858528	0.7669	1.05424
ka06_a_5	1.22416	1.11099	0.956903	0.810037	0.95514	1.0634			ka06_k_5	1.25213	1.234	1.21687	1.20993	1.15679	0.929958
ka07_a_5	0.86143	0.983605	0.744405	0.804228	1.05836	0.888548			ka07_k_5	0.885282	0.666522	0.552187	0.771507	0.623999	0.601749
ka08_a_5	0.891091	0.888569	0.908314	1.09104	0.74484	0.739098			ka08_k_5	1.13877	1.15872	1.19641	1.26472	1.05046	1.17121
ka09_a_5	0.887811	1.04941	0.835121	0.746828	0.643251	0.503053			ka09_k_5	1.14699	0.904333	1.18288	1.20914	1.18841	1.30414
ka11_a_5	0.91308	0.926079	0.819035	0.920845	0.853657	0.895753			ka11_k_5	0.989936	1.03168	1.07281	1.18268	1.18526	0.605372
ka12_a_5	1.02289	1.09662	1.0837	1.06696	1.07452	1.09444			ka12_k_5	1.21218	1.18273	1.1577	1.02945	1.13388	1.08337
ka13_a_5	1.1759	1.14931	1.12727	1.12461	1.12549	1.12958			ka13_k_5	1.09659	1.17261	1.18067	1.15722	1.18278	1.17628
ka15_a_5	0.905334	0.871095	0.78779	0.853305	0.826579	0.75033			ka15_k_5	0.859468	0.802499	0.792033	1.00666	0.663284	0.985054
ka16_a_5	0.903602	0.860593	0.558447	0.843439	0.880876	0.81141			ka16_k_5	0.844827	0.711594	0.569569	1.11798	0.998707	1.00657
ka17_a_5	0.884025	0.928722	0.97973	0.905391	1.06943	0.955179			ka17_k_5	0.994171	1.11069	1.14686	1.05642	1.11576	0.952686
File name	SDNN_5	SDNN_10	SDNN_15	SDNN_20	SDNN_25	SDNN_30			File name	SDNN_5	SDNN_10	SDNN_15	SDNN_20	SDNN_25	SDNN_30
ak01_a_5	65.1735	76.4618	59.1778	54.7478	66.2106	53.3365			ak1_k_5	51.2026	66.9024	59.9017	66.6069	74.4759	82.2158
ak02_a_5	85.5552	75.0007	128.262	113.69	108.047	100.779			ak2_k_5	100.771	93.842	86.7649	99.0024	93.1916	120.74
ak03_a_5	46.7973	60.4868	47.3425	44.984	65.069	50.6221			ak3_k_5	103.069	102.588	108.653	108.097	96.7442	66.5413
ak04_a_5	59.4094	80.6537	76.331	80.9317	70.6715	80.4408			ak4_k_5	82.5696	92.1856	75.4831	71.9851	59.1471	52.2219
ak05_a_5	73.7311	62.0881	66.1804	64.896	56.0029	68.5468			ak5_k_5	79.3352	80.7515	77.6701	80.7648	97.7991	82.7698
ak06_a_5	54.3166	46.2472	45.0844	46.0291	53.5692	42.3586			ak6_k_5	62.9307	58.7877	69.8684	71.4783	70.0732	68.3771
ak07_a_5	48.6277	57.2456	38.7798	69.0674	55.1591	61.8608			ak7_k_5	54.9975	84.3036	97.1076	120.063	80.4556	126.546
ak09_a_5	55.3242	38.8543	33.4196	30.3923	25.8727	27.061			ak9_k_5	49.8884	45.3468	54.2461	44.1786	69.4197	73.7476
ak10_a_5	67.7465	54.5238	64.215	70.4059	45.2633	70.4746			ak10_k_5	106.591	92.8313	100.159	87.2382	87.9514	127.353
ak11_a_5	80.9678	70.1249	61.0471	63.7678	72.8903	55.8132			ak11_k_5	48.4261	65.0107	73.6189	73.1631	90.7496	74.903
ak12_a_5	75.6767	70.2923	74.2974	95.1026	64.2573	68.5429			ak12_k_5	68.6676	66.1038	63.6688	129.257	111.09	70.309
ka01_a_5	79.3791	76.1142	68.5639	70.7725	76.1997	59.8486			ka01_k_5	82.8264	85.075	98.0122	84.9277	74.8952	86.0168
ka02_a_5	101.617	95.6624	96.2096	85.3889	48.4704	59.5785			ka02_k_5	123.623	69.9946	88.9981	112.634	122.45	145.135
ka03_a_5	41.6706	52.3362	46.6072	35.1314	29.9455	26.3067			ka03_k_5	33.6783	27.6952	34.4553	36.1389	28.2932	28.7937
ka05_a_5	94.5984	84.38	96.2569	126.212	114.425	113.238			ka05_k_5	77.5207	83.3383	84.1343	100.372	93.4901	84.7623
ka06_a_5	103.029	119.086	153.211	146.837	164.488	142.267			ka06_k_5	104.777	122.073	132.085	134.384	139.542	131.955
ka07_a_5	134.988	106.514	157.128	133.901	118.592	138.289			ka07_k_5	106.809	110.49	138.166	139.791	139.062	157.475
ka08_a_5	42.0674	46.8683	42.8053	36.717	45.9128	40.164			ka08_k_5	68.9861	76.1205	72.1926	53.969	94.7739	52.6614
ka09_a_5	71.371	77.7865	66.0044	67.5227	78.8673	65.4292			ka09_k_5	62.5982	80.6641	69.1732	57.524	69.6023	44.4062
ka11_a_5	66.2504	71.3716	80.5586	60.8603	65.0213	66.8759			ka11_k_5	52.5937	66.8453	58.8112	58.5777	72.6141	68.9564
ka12_a_5	72.4343	70.8861	76.0817	74.6377	74.4597	69.8174			ka12_k_5	112.192	116.886	114.558	142.558	164.086	134.436
ka13_a_5	51.4111	50.484	52.2828	52.6375	53.1774	49.351			ka13_k_5	60.9122	57.9157	51.3647	59.3516	60.4404	58.8728
ka15_a_5	33.4238	34.8662	37.0554	33.8019	35.9455	31.7092			ka15_k_5	41.0875	44.4663	43.4274	36.0349	41.7995	33.7642
ka16_a_5	73.7564	71.392	72.2524	68.0492	59.9947	62.4027			ka16_k_5	96.1394	98.4381	88.9675	78.1478	78.0902	83.3924
ka17_a_5	109.914	73.8261	55.2203	65.2377	79.4503	72.01			ka17_k_5	93.8914	82.3791	64.508	86.9483	76.5672	75.5315
File name	HR_5	HR_10	HR_15	HR_20	HR_25	HR_30			File name	HR_5	HR_10	HR_15	HR_20	HR_25	HR_30
ak01_a_5	749.875	770.509	761.533	774.935	707.481	697.451			ak1_k_5	770.355	804.504	804.279	815.337	831.767	869.698
ak02_a_5	1110.4	1156.73	1058.11	1048.48	1022.46	1044.43			ak2_k_5	972.665	991.695	1001.53	1030.12	1016.85	1034.28
ak03_a_5	710.798	741.531	724.019	708.057	709.976	672.116			ak3_k_5	962.064	961.846	974.195	987.815	989.184	1006.79
ak04_a_5	753.602	761.878	746.736	750.37	758.856	761.33			ak4_k_5	760.448	789.868	796.995	810.011	826.479	801.809
ak05_a_5	809.437	827.262	818.147	798.251	799.245	785.801			ak5_k_5	869.923	926.728	932.832	914.055	894.812	915.622
ak06_a_5	680.451	693.441	716.981	723.103	743.378	725.558			ak6_k_5	747.884	777.472	789.053	808.259	811.676	813.73
ak07_a_5	713.91	728.665	709.539	707.609	718.559	716.501			ak7_k_5	798.844	868.754	844.921	890.274	939.55	842.12
ak09_a_5	622.267	606.4	600.933	595.697	587.766	579.011			ak9_k_5	688.789	718.182	727.806	726.731	763.939	752.567
ak10_a_5	762.938	774.629	777.797	735.353	711.82	722.178			ak10_k_5	828.82	833.533	840.616	894.376	973.299	985.692
ak11_a_5	684.252	675.784	649.232	658.722	656.739	624.774			ak11_k_5	622.042	678.615	723.894	772.247	738.507	744.789
ak12_a_5	856.086	827.416	834.953	797.117	794.339	763.878			ak12_k_5	798.058	795.735	791.398	902.952	857.749	810.88
ka01_a_5	764.06	756.559	739.53	733.683	717.068	656.947			ka01_k_5	704.235	792.063	818.376	824.78	856.514	806.796
ka02_a_5	806.242	852.841	841.624	801.914	888.26	928.879			ka02_k_5	1031.6	1074.54	1042.23	1027.28	996.773	1040.96
ka03_a_5	572.471	581.826	577.731	566.267	560.693	554.298			ka03_k_5	611.98	626.979	616.23	615.828	621.383	604.346
ka05_a_5	767.966	796.7	784.555	804.054	810.616	777.751			ka05_k_5	697.105	720.942	768.01	748.91	714.657	743.221
ka06_a_5	809.45	843.764	820.723	791.673	845.33	865.222			ka06_k_5	882.339	920.736	920.466	980.81	940.1	920.547
ka07_a_5	867.391	964.514	911.2	865.838	932.696	1039.03			ka07_k_5	899.08	920.699	865.538	872.291	842.652	883.647
ka08_a_5	633.632	637.67	647.768	636.075	637.417	632.239			ka08_k_5	788.202	835.543	843.258	876.749	857.554	835.168
ka09_a_5	696.229	727.773	705.691	694.264	661.662	655.884			ka09_k_5	801.194	820.625	817.515	829.271	822.444	854.292
ka11_a_5	717.19	715.704	748.555	713.119	717.074	721.061			ka11_k_5	635.435	664.683	666.862	667.044	695.056	718.633
ka12_a_5	607.219	613.64	621.081	619.918	618.592	611.911			ka12_k_5	902.05	986.518	986.263	992.384	941.592	946.212
ka13_a_5	715.041	718.854	724.365	712.564	722.364	719.369			ka13_k_5	723.557	741.832	744.596	754.899	825.322	810.216
ka15_a_5	629.062	628.478	627.152	628.254	629.487	618.589			ka15_k_5	669.13	668.321	671.481	658.658	654.183	656.937
ka16_a_5	714.097	712.827	681.323	711.805	702.891	690.318			ka16_k_5	788.719	778.888	761.35	833.378	794.233	808.141
ka17_a_5	781.923	739.7	734.278	728.589	739.769	712.891			ka17_k_5	765.6	828.575	897.641	874.076	839.765	796.37

## Sheet: experiment4
participant's №	SampEn_rest	SDNN_rest	av-RR_rest	SampEn_stress	SDNN_stress	av-RR_stress
1	0.664867	23.5075	472.19	0.416337	23.2082	410.661
10	0.447935	47.9904	504.565	1.01003	19.5193	396.482
11	0.638663	56.1394	534.3	0.322884	28.8735	405.297
12	0.920897	77.2027	523.566	0.229475	26.5079	355.017
13	1.06945	82.6308	647.709	0.453013	54.1104	470.366
2	1.07291	64.5339	686.012	0.584626	67.6986	530.964
3	0.508355	52.7094	490.632	0.671346	29.8822	471.519
4	0.364817	42.0765	481.034	0.380177	27.1924	418.597
5	0.768484	50.5616	584.946	0.502999	43.2596	493.224
6	1.0917	44.8125	825.899	1.01856	61.1009	710.88
7	1.07849	119.834	775.463	0.583705	64.522	532.632
8	1.22872	69.2771	701.483	1.04889	46.2032	606.107
9	0.728638	56.5981	597.567	0.614298	43.2807	423.898

## Sheet: experiment5
SampEN							SDNN							av-RR
100_point	110_point	120_point	130_point	140_point	150_point		100_point	110_point	120_point	130_point	140_point	150_point		100_point	110_point	120_point	130_point	140_point	150_point
0.841702	0.760286	0.819127	0.814891	0.768907	0.787599		833.98	859.28	876.32	883.04	880.28	880.08		85.8946	77.123	66.4715	64.6594	65.4615	65.656
0.539813	0.542995	0.575965	0.619765	0.649767	0.652873		783.6	781.72	772.32	774.48	770.04	760.92		57.074	55.0469	57.1445	55.6238	53.7654	53.3242
0.678034	0.678332	0.688233	0.678332	0.839576	0.807657		932.08	937.72	938	934.56	929.4	918.2		56.5091	52.503	52.3175	58.0111	62.6134	60.822
1.04016	0.744239	0.80722	0.841426	0.793836	0.750558		942.12	946	944	935.84	929.52	930.48		40.6446	27.2969	26.132	33.9879	37.0806	37.7647
0.697943	0.780559	0.706941	0.775983	0.781837	0.745055		757.32	758.6	756.72	753.64	751.8	746.2		34.181	33.0593	32.3351	30.6364	29.7368	36.5836
0.86858	0.812791	0.814547	0.811558	0.796944	0.891172		741.72	741.84	742.82	737.78	735.24	729.68		90.8272	92.2618	87.5535	88.4099	81.892	67.4328
0.720884	0.721585	0.659995	0.696817	0.744239	0.727177		722.84	722.88	721.76	720.16	718.04	716.2		30.3594	31.1183	32.1313	30.6981	30.2231	29.6614
0.793329	0.833526	0.922426	0.934584	0.949535	0.991326		661.6	668.68	667.56	671.88	671.88	681.24		43.0999	40.0722	37.4076	36.802	32.1917	25.0292
0.790979	0.842021	0.883855	0.849846	0.801282	0.768966		797.28	804.84	807.84	804.44	799.04	792.8		35.4892	25.2874	23.4601	24.5985	27.6788	35.0907
0.704279	0.682218	0.689763	0.715912	0.729635	0.869869		807.52	803.52	799.2	799.84	797.88	797.88		58.9163	56.6739	53.8917	58.3093	58.2751	61.158
0.478523	0.581295	0.70724	0.839658	0.835215	0.825777		663.88	644.2	634.56	622.28	626.36	635.16		102.451	83.4772	73.6077	49.235	50.1361	50.3469
0.825231	0.683359	0.812721	0.802767	0.89629	0.84928		851.48	854.76	851.28	845.36	839.56	839.6		41.5217	38.005	41.114	41.6278	43.4618	43.1722
0.843609	0.681359	0.894629	0.797614	0.606136	0.579129		749.12	761.16	769.08	771.44	772.76	775.32		40.7768	38.0538	40.2745	41.1009	39.8666	38.2332
0.878243	0.79493	0.82198	0.781254	0.838329	0.814627		1019.2	1039.76	1043.8	1043	1044.8	1043.8		91.6864	62.7957	61.917	63.2187	62.0013	62.4138
0.739834	0.399894	0.411196	0.417093	0.439951	0.720124		803.44	811.24	808.52	806.08	804.88	804.96		52.4474	39.8023	38.1058	38.7463	38.4399	40.4499
0.864997	0.800778	0.805288	0.746616	0.731078	0.696155		716.96	728.6	736.48	745.48	753.76	763.84		29.9606	45.0222	50.1271	53.1493	54.4832	54.5173
0.818512	0.59652	0.611174	0.56767	0.580559	0.61422		966.4	974.92	978.4	980.68	982.68	982.28		100.736	70.7985	74.4795	75.7555	76.8709	75.6925
0.74165	0.809851	0.682676	0.671305	0.725743	0.726534		780.8	759.92	747.64	743.2	738.04	735.36		66.0957	47.1253	39.8882	37.5915	35.4152	34.6397
0.658462	0.57292	0.528698	0.609213	0.680977	0.640182		642.8	647.52	649.4	649.8	648.16	648.96		34.901	33.1217	33.8059	33.7016	33.0184	35.0822
0.829425	0.80668	0.799594	0.803873	0.82706	0.872488		819.32	820.96	831	838.48	840.92	829.28		48.339	47.3088	37.9868	33.9401	30.3729	50.5834
0.685385	0.690366	0.701634	0.626359	0.583146	0.691192		759.76	760.24	752.44	752.2	757.72	766.84		65.3258	67.1591	69.7811	69.396	77.5304	82.1419
0.896088	0.87718	0.900984	0.650588	0.741937	0.775983		796.12	800.08	799.96	809.56	814.76	819.12		42.9305	41.8071	41.5557	37.5825	33.3308	27.7969
0.791948	0.870522	0.889262	0.876017	0.851752	0.944105		637.76	646.72	639.88	639.12	638.04	635.04		39.9012	26.2534	24.0696	23.9104	23.1136	22.0118
0.76608	0.780489	0.852777	0.885985	0.919228	0.840783		829.48	844.04	839.24	843.8	852.04	864.72		100.009	90.9866	87.2233	83.9588	81.8418	71.3535
0.751669	0.699821	0.686179	0.690808	0.661398	0.646398		712.2	716.12	718.24	714.48	712.04	703.56		80.4614	82.5018	83.8176	83.313	85.9069	85.9784
1.01514	0.781837	0.753772	0.728795	0.697237	0.684655		776.6	775.68	774.16	765.32	755.64	756.41		60.8956	52.4768	53.9434	53.0782	52.1294	52.8447
